# Supplementary material for: In Silico Identification of Novel Inhibitors Targeting the Homodimeric Interface of Superoxide Dismutase from the Dental Pathogen Streptococcus mutans
Source: MDPI journal article supplement (doi:10.3390/antiox11040785), 2022-04-15
Supplement: s1 [file s1]

# Supporting Information for

## **In silico identification of novel inhibitors targeting the homodimeric interface of superoxide dismutase from the dental pathogen *Streptococcus mutans***

Carmen Cerchia <sup>1,†</sup>, Emanuela Roscetto <sup>2,†</sup>, Rosarita Nasso <sup>2,3</sup>, Maria Rosaria Catania <sup>2</sup>, Emmanuele De Vendittis <sup>2</sup>, Antonio Lavecchia <sup>1</sup>, Mariorosario Masullo <sup>2,3,4,\*</sup> and Rosario Rullo <sup>2,5,\*</sup>

<sup>1</sup> Department of Pharmacy, "Drug Discovery" Laboratory, University of Naples Federico II, 80131 Naples, Italy; carmen.cerchia@unina.it (C.C.); antonio.lavecchia@unina.it (A.L.)

<sup>2</sup> Department of Molecular Medicine and Medical Biotechnology, University of Naples Federico II, 80131 Naples, Italy; emanuela.roschetto@unina.it (E.R.); mariarosaria.catania@unina.it (M.R.C.); devendit@unina.it (E.D.V.)

<sup>3</sup> Department of Human Movement Sciences and Wellness, University of Naples "Parthenope", 80133 Naples, Italy; rosarita.nasso@collaboratore.uniparthenope.it (R.N.); mario.masullo@uniparthenope.it (M.M.)

<sup>4</sup> CEINGE, Biotecnologie Avanzate S.C.a R.L., 80145 Naples, Italy

<sup>5</sup> Institute for the Animal Production Systems in the Mediterranean Environment, 80147 Naples, Italy; rosario.rullo@cnr.it (R.R.)

## Table of Contents

- Figure S1. Sequence alignments of mature forms of *Sm*SOD, *St*SOD, Fe-SOD from *E. coli* and Mn-SOD from rat mitochondria
- Table S1. Compounds identified by virtual screening
- Table S2. Values of IC<sub>50</sub> obtained for various SODs in the presence of **ALS-31**

|                           |               |            |            |            |            |             |     |
|---------------------------|---------------|------------|------------|------------|------------|-------------|-----|
| <i>Sm</i> SOD             | AILLPDLPYA    | YDALEPYIDA | ETMTLHHDKH | HATYVANANA | ALEKHPEIGE | NLEVLLADVE  | 60  |
| <i>St</i> SOD             | AIILPDLPYA    | YDALEPYIDA | ETMTLHHDKH | HATYVANANA | ALEKHPEIGE | DLEALLADVE  |     |
| Fe-SOD ( <i>E. coli</i> ) | SFELPALPYA    | KDALAPHISA | ETIEYHYGKH | HQTYVTNLNN | LIKGTAFEGK | SLEEIIRSSE  |     |
| Mn-SOD (rat)              | KHSLPDLPYD    | YGALEPHINA | QIMQLHHSKH | HATYVNNLNV | TEEKYH---- | ---EALAKGDV |     |
|                           | ** ***        | .** *.*.*  | : : *.*.*  | * *** * *  | :          | * : .       |     |
|                           |               |            |            |            |            |             |     |
| <i>Sm</i> SOD             | QIPADIRQSL    | INNNGGHLNH | ALFWELLSPE | KT-KVTAEVA | AAINEAFGSF | DDFKAAFTAA  | 119 |
| <i>St</i> SOD             | KIPADIRQAL    | INNNGGHLNH | ALFWELLSPE | KQ-EPTAEVA | AAINEAFGSF | EAFAQEVFTTS |     |
| Fe-SOD ( <i>E. coli</i> ) | G-----GV      | FNNAAQVWNH | TFYWNCLAPN | AGGEPTGKVA | EAIAASFGSF | ADFKAQFTDA  |     |
| Mn-SOD (rat)              | TTQVALQPAL    | KFNGGGHINH | SIFWTNLSPK | GGGEPKGELL | EAIKRDFGSF | EKFKEKLTAV  |     |
|                           | .: *.. **     | :::* *:.*  | : ...:     | ** ****    | *: :*      |             |     |
|                           |               |            |            |            |            |             |     |
| <i>Sm</i> SOD             | ATTRFGSGWA    | WLVDKE-GK  | LEVTSTANQD | TPI--SQGLK | PILALDVWEH | AYYLNRYNVR  | 176 |
| <i>St</i> SOD             | ATTRFGSGWA    | WLVDNAE-GK | LEVSTPNQD  | TPI--SDGKK | PILALDVWEH | AYYLYKNVR   |     |
| Fe-SOD ( <i>E. coli</i> ) | AIKNFGSGWT    | WLKNSD-GK  | LAIVSTSNAG | TPL--TTDAT | PLLTVDVWEH | AYYIDYRNAR  |     |
| Mn-SOD (rat)              | SVGQVQSGWG    | WLGFNKEQGR | LQIAACSNQD | -PLQGTGLI  | PLLGDVWEH  | AYYLYKNVR   |     |
|                           | : **** **     | : : *      | * :.: .*   | *: : .     | *.* :***** | ***:.*.*.*  |     |
|                           |               |            |            |            |            |             |     |
| <i>Sm</i> SOD             | PNYIKAFFEV    | INWNTVARLY | AEALTK     | 202        |            |             |     |
| <i>St</i> SOD             | PNYIKAFFEI    | INWNKVAELY | AEA--K     |            |            |             |     |
| Fe-SOD ( <i>E. coli</i> ) | PGYLEHFWAL    | VNWEFVAKNL | AA----     |            |            |             |     |
| Mn-SOD (rat)              | PDYLKAIWNV    | INWENVSQRY | IVC-KK     |            |            |             |     |
|                           | *.*.: : : : * |            |            |            |            |             |     |

Figure S1. Sequence alignments of mature forms of *Sm*SOD, *St*SOD, Fe-SOD from *E. coli* and the Mn-SOD from rat mitochondria. Alignment was performed with MUSCLE [Edgar, R.C. MUSCLE: Multiple sequence alignment with high accuracy and high throughput. *Nucleic Acids Res.* **2004**, *32*, 1792–1797]. The residues mainly involved in dimer assembly (E21, H30, S126, E165, H166, Y169, R173, residue numbering referred to the PDB structure 4YIP) are highlighted in pink.

**Table S1.** Compounds identified by virtual screening.

| N. | Code    | Approach | ID     | Structure                                                                            |
|----|---------|----------|--------|--------------------------------------------------------------------------------------|
| 1  | 1149684 | LBVS     | ALS-1  | 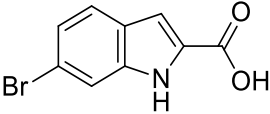   |
| 2  | 1088043 | LBVS     | ALS-2  |    |
| 3  | 1794806 | LBVS     | ALS-3  |    |
| 4  | 2251077 | LBVS     | ALS-4  |    |
| 5  | 1593018 | LBVS     | ALS-5  |    |
| 6  | 2201826 | LBVS     | ALS-6  |   |
| 7  | 3543934 | LBVS     | ALS-7  |  |
| 8  | 5042299 | LBVS     | ALS-8  |  |
| 9  | 1973472 | LBVS     | ALS-9  |  |
| 10 | 2229874 | LBVS     | ALS-10 |  |

|    |            |      |        |                                                                                      |
|----|------------|------|--------|--------------------------------------------------------------------------------------|
| 11 | 9080680    | LBVS | ALS-11 | 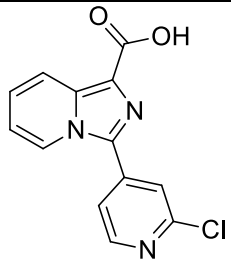   |
| 12 | 4041753    | LBVS | ALS-12 |    |
| 13 | 1780792    | LBVS | ALS-13 |    |
| 14 | 6328802    | LBVS | ALS-14 |   |
| 15 | 7119870050 | LBVS | ALS-15 |  |
| 16 | 3339531    | LBVS | ALS-16 |  |
| 17 | 1975653    | LBVS | ALS-17 |  |
| 18 | 0128660069 | SBVS | ALS-18 |  |
| 19 | 1086703    | LBVS | ALS-19 |  |

|    |         |      |        |                                                                                      |
|----|---------|------|--------|--------------------------------------------------------------------------------------|
| 20 | 1045880 | LBVS | ALS-20 | 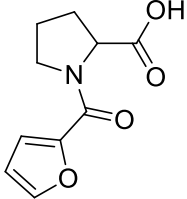   |
| 21 | 1331803 | SBVS | ALS-21 |    |
| 22 | 6923424 | LBVS | ALS-22 |    |
| 23 | 6051822 | LBVS | ALS-23 |   |
| 24 | 7138831 | LBVS | ALS-24 |  |
| 25 | 2222682 | LBVS | ALS-25 |  |
| 26 | 2214908 | LBVS | ALS-26 |  |
| 27 | 2270454 | LBVS | ALS-27 |  |
| 28 | 3533961 | LBVS | ALS-28 |  |

|    |         |      |        |                                                                                      |
|----|---------|------|--------|--------------------------------------------------------------------------------------|
| 29 | 2195404 | SBVS | ALS-29 | 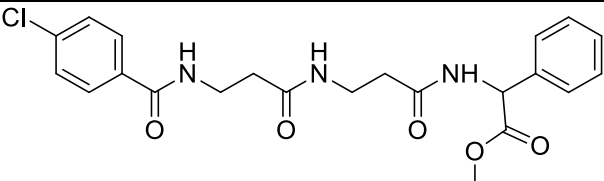   |
| 30 | 4794984 | SBVS | ALS-30 |    |
| 31 | 1098697 | SBVS | ALS-31 |   |
| 32 | 3460720 | SBVS | ALS-32 |  |
| 33 | 6242859 | SBVS | ALS-33 |  |
| 34 | 6244314 | SBVS | ALS-34 |  |
| 35 | 7131627 | SBVS | ALS-35 |  |

|    |         |      |        |                                                                                                                                                                                                                                                                                                                                                                                                                                                                                                                                     |
|----|---------|------|--------|-------------------------------------------------------------------------------------------------------------------------------------------------------------------------------------------------------------------------------------------------------------------------------------------------------------------------------------------------------------------------------------------------------------------------------------------------------------------------------------------------------------------------------------|
| 36 | 7567692 | SBVS | ALS-36 | 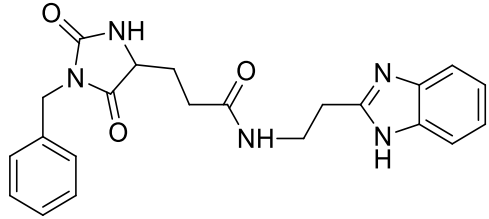 <p>The chemical structure of ALS-36 is a complex molecule featuring a benzimidazole ring system on the right, connected via a methylene group to a carbonyl group. This carbonyl is part of a chain that includes a hydantoin-like moiety (a five-membered ring with two carbonyl groups and an NH group) which is further substituted with a benzyl group. The full structure is: <chem>c1ccc2c(c1)c(c[nH]2)CCNC(=O)CCC(=O)Nc3ccccc3</chem></p> |
|----|---------|------|--------|-------------------------------------------------------------------------------------------------------------------------------------------------------------------------------------------------------------------------------------------------------------------------------------------------------------------------------------------------------------------------------------------------------------------------------------------------------------------------------------------------------------------------------------|



Table S2. Values of IC<sub>50</sub> obtained for various SODs in the presence of **ALS-31**

| SOD group    | Source                            | IC <sub>50</sub> (μM) |
|--------------|-----------------------------------|-----------------------|
| Cambialistic | <i>Streptococcus mutans</i>       | 159 ± 19              |
| "            | <i>Streptococcus thermophilus</i> | 218 ± 50              |
| Fe-SOD       | <i>Escherichia coli</i>           | 123 ± 20              |
| Mn-SOD       | Rat mitochondria                  | 161 ± 56              |
| Cu/Zn-SOD    | Bovine erythrocytes               | 146 ± 25              |
